# Supplementary material
Source: PubMed Central journal article supplement (PMC5028323)

**Supplementary Table 1** Adjusted Odds Ratios and 95% confidence intervals for the associations between waist and hip circumferences and risk of Barrett's esophagus with and without adjusting for frequency of GERD symptoms, compared with population-based controls

|                     | No. of studies | OR <sup>a</sup> (95% CI) | I <sup>2</sup> | OR <sup>b</sup> (95% CI) | I <sup>2</sup> |
|---------------------|----------------|--------------------------|----------------|--------------------------|----------------|
| Waist circumference |                |                          |                |                          |                |
| Tertile 1           | 6              | Referent                 |                | Referent                 |                |
| Tertile 2           | 6              | 1.37 (1.08-1.74)         | 9%             | 1.47 (1.04-2.09)         | 43%            |
| Tertile 3           | 6              | 1.68 (1.28-2.22)         | 4%             | 1.60 (1.12-2.30)         | 21%            |
| Per 5 cm increase   | 6              | 1.14 (1.04-1.24)         | 63%            | 1.10 (1.01-1.21)         | 52%            |
| Hip circumference   |                |                          |                |                          |                |
| Tertile 1           | 6              | Referent                 |                | Referent                 |                |
| Tertile 2           | 6              | 0.86 (0.69-1.08)         | 0%             | 0.85 (0.65-1.10)         | 0%             |
| Tertile 3           | 6              | 0.78 (0.58-1.04)         | 11%            | 0.73 (0.53-1.00)         | 0%             |
| Per 5 cm increase   | 6              | 0.89 (0.81-0.99)         | 46%            | 0.89 (0.81-0.97)         | 8%             |

NOTE. Cleveland was excluded due to missing data on GERD symptoms for controls.

<sup>a</sup>Models included terms for age (<50, 50-<60, 60-<70, 70+), sex (except NDB), education, smoking (ever, never), waist circumference and hip circumference.

<sup>b</sup>Models adjusted for same factors as (a) but also frequency of GERD symptoms (less than weekly, at least weekly).

CI, confidence interval; OR, odds ratio; GERD, gastroesophageal reflux disease.

**Supplementary Table 2** Adjusted Odds Ratios and 95% confidence intervals for the associations of combinations of waist and hip circumferences and risk of Barrett's esophagus in males, compared with population-based controls

|                   |           | Waist circumference |                  |                  |
|-------------------|-----------|---------------------|------------------|------------------|
|                   |           | Tertile 1           | Tertile 2        | Tertile 3        |
| Hip circumference |           |                     |                  |                  |
|                   | Tertile 1 | Referent            | 1.23 (0.86-1.76) | 2.06 (0.93-4.57) |
|                   | Tertile 2 | 0.80 (0.54-1.18)    | 1.23 (0.95-1.60) | 1.46 (1.02-2.08) |
|                   | Tertile 3 | 0.65 (0.21-2.06)    | 0.87 (0.54-1.38) | 1.47 (0.90-2.42) |

NOTE. Models included terms for age (<50, 50-<60, 60-<70, 70+), education (except UNC & Cleveland), and smoking (ever, never; except Cleveland).

**Supplementary Figure 1** Forest plot of the association between increasing tertiles of hip circumference and risk of Barrett's esophagus compared with population-based controls. Models included terms for age (<50, 50-<60, 60-<70, 70+), sex, education (except Cleveland), smoking (ever, never; except Cleveland), waist circumference and hip circumference. Participating studies: Houston, the Houston Barrett's Esophagus study; Cleveland, the Cleveland Barrett's Esophagus Study(Case Comprehensive Cancer Center: University Hospitals Case Medical Center and Cleveland Clinic Foundation); FINBAR, the Factors Influencing the Barrett's/Adenocarcinoma Relationship study (Ireland); KPNC, the Epidemiology and Incidence of Barrett's Esophagus study (Kaiser Permanente, Northern California); NDB, The Newly Diagnosed Barrett's Esophagus Study (University of Michigan and Ann Arbor Veterans Affairs Medical Center, Michigan); SDH, the Study of Digestive Health (Brisbane, Australia); and Washington, the Study of Reflux Disease (western Washington State).

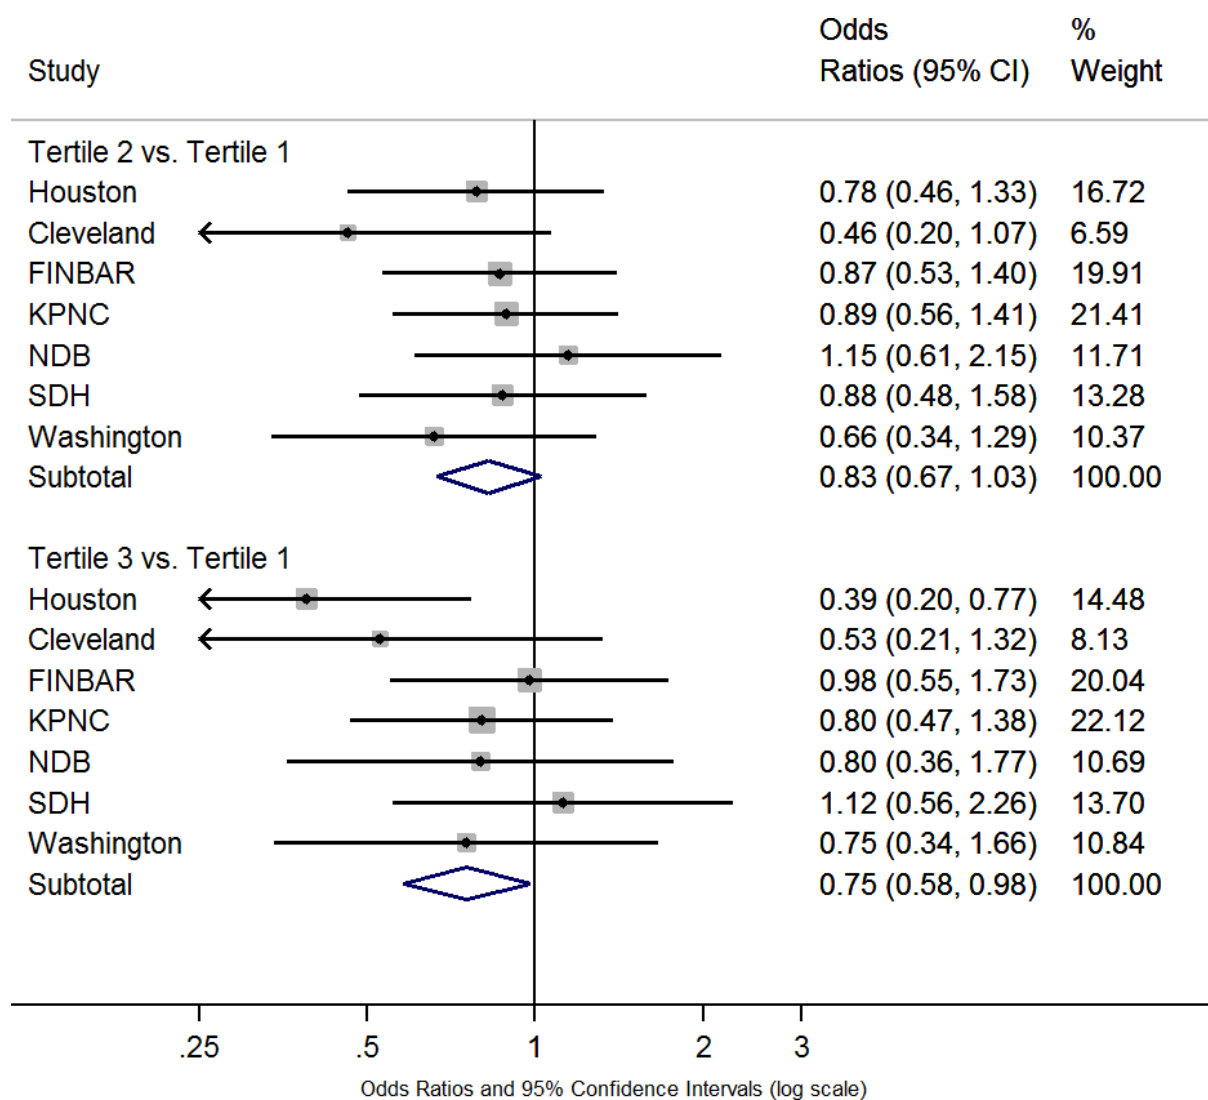

Supplement: NIHMS792287-supplement-supplement_1.pdf [file NIHMS792287-supplement-supplement_1.pdf]
